# Supplementary material for: A mechanistic study of ethanol transformation into ethene and acetaldehyde on an oxygenated Au-exchanged ZSM-5 zeolite
Source: Royal Society of Chemistry journal article supplement (doi:10.1039/c7ra06313j), 2017-01-01
Supplement: c7ra06313j1.pdf [file c7ra06313j1.pdf]

## Supplementary Information:

### Mechanistic Study of Ethanol Transformation into Ethene and Acetaldehyde on Oxygenated Au-Exchanged ZSM-5 Zeolite

Yuwanda Injongkol<sup>a,b</sup>, Thana Maihom<sup>a,b</sup>, Saowapak Choomwattana<sup>c</sup>, Bundet Boekfa<sup>a,b</sup>, and Jumras Limtrakul<sup>d</sup>

<sup>a</sup>Department of Chemistry, Faculty of Liberal Arts and Science, Kasetsart University, Kamphaeng Saen Campus, Nakhon Pathom 73140, Thailand

<sup>b</sup>Center for Advanced Studies in Nanotechnology and Its Applications in Chemical, Food and Agricultural Industries and NANOTEC Center for Nanoscale Materials Design for Green Nanotechnology, Kasetsart University, Bangkok 10900, Thailand.

<sup>c</sup>Center of Data Mining and Biomedical Informatics, Faculty of Medical Technology, Mahidol University, Salaya Campus, Nakhon Pathom 73170, Thailand.

<sup>d</sup>Department of Materials Science and Engineering, Vidyasirimedhi Institute of Science and Technology, Rayong 21210, Thailand.

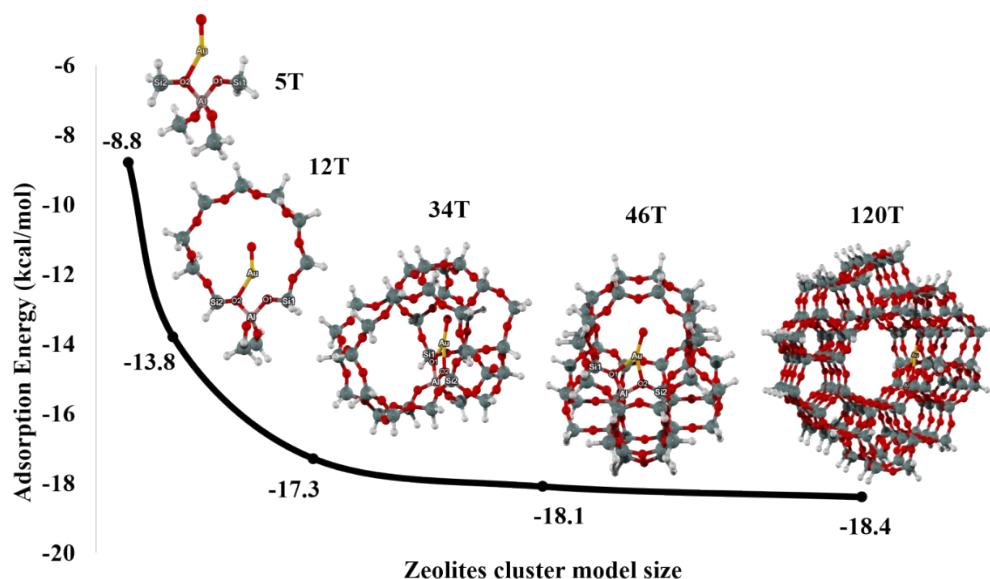

**Fig. S1** The ethanol adsorption energies of the AuO/ZSM-5 as a function of the cluster model sizes.

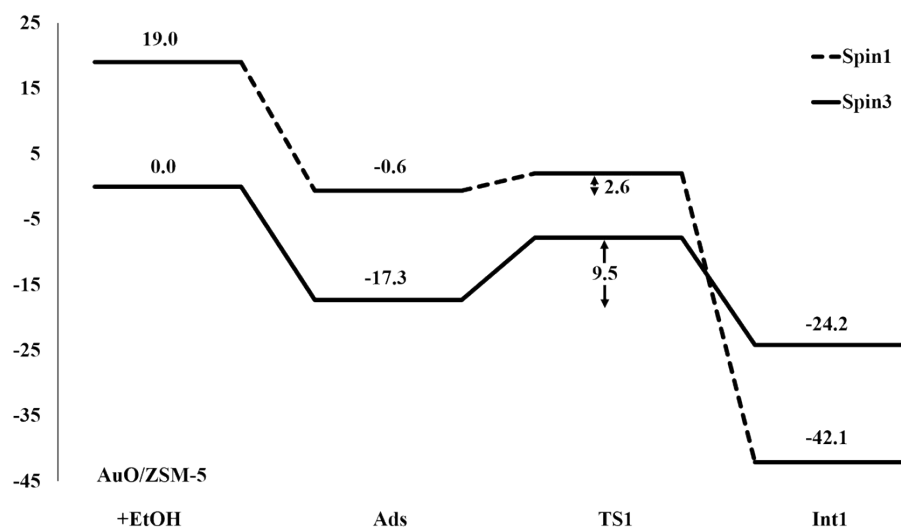

**Fig. S2** Energy profile for the ethoxide-hydroxide intermediate formation on AuO/ZSM-5 for singlet state (dot line) and triplet state (solid line). Energies are in kcal/mol.

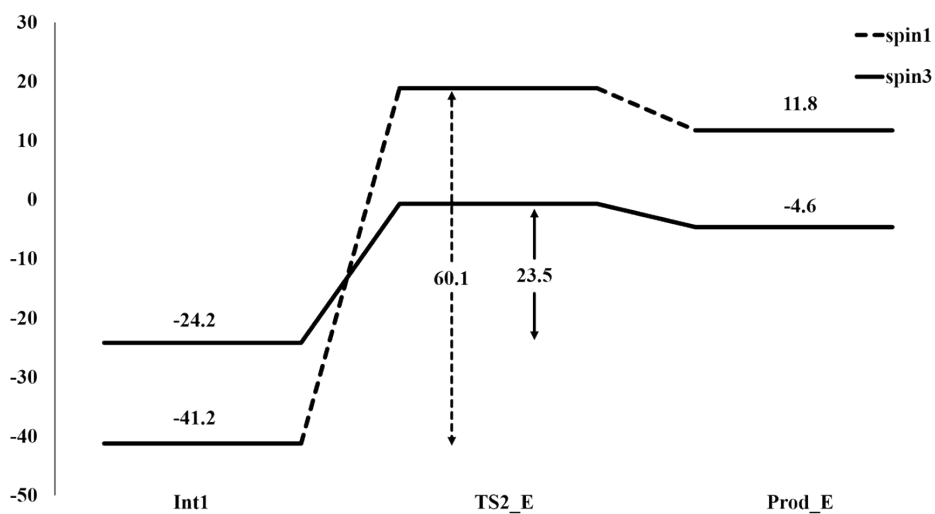

**Fig. S3** Energy profile for the ethoxide-hydroxide conversion to ethene on AuO/ZSM-5 for singlet state (dot line) and triplet state (solid line). Energies are in kcal/mol.

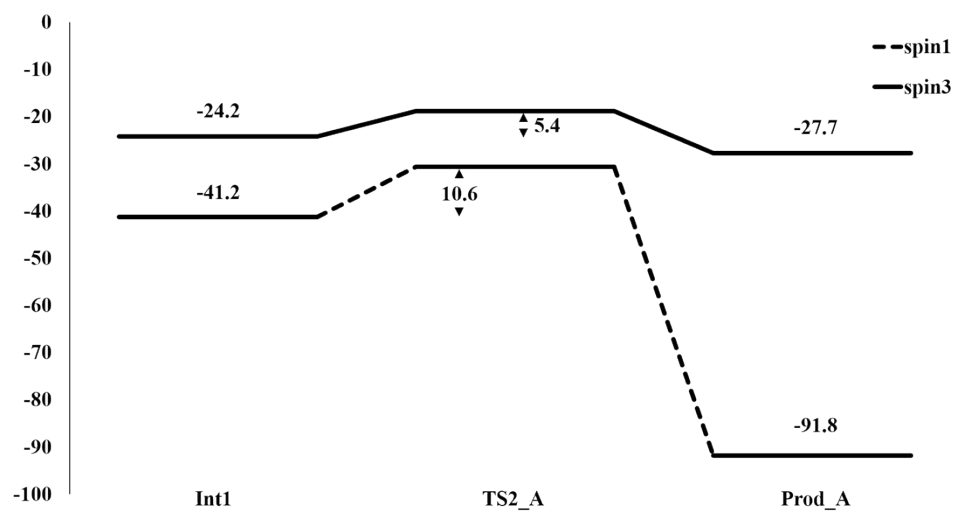

**Fig. S4** Energy profile for the ethoxide-hydroxide conversion to acetaldehyde on AuO/ZSM-5 for singlet state (dot line) and triplet state (solid line). Energies are in kcal/mol.

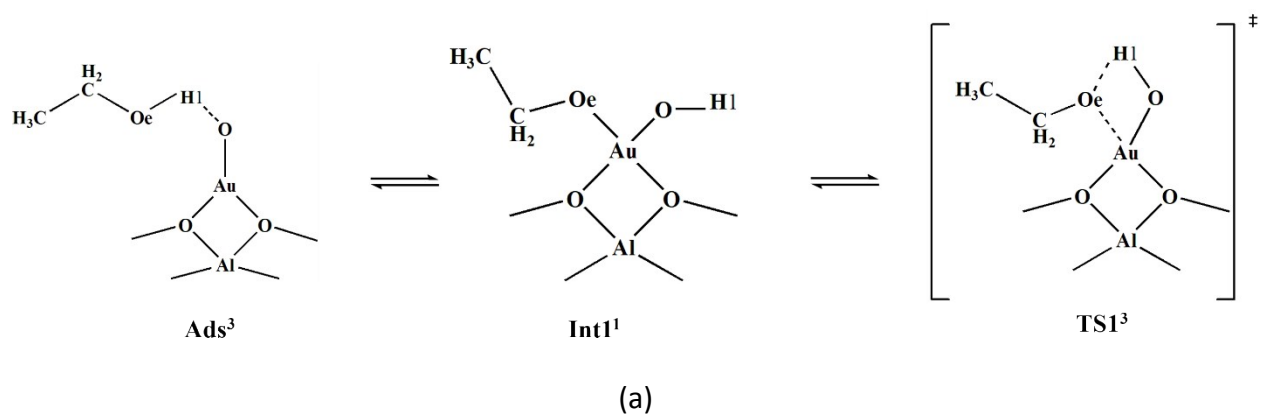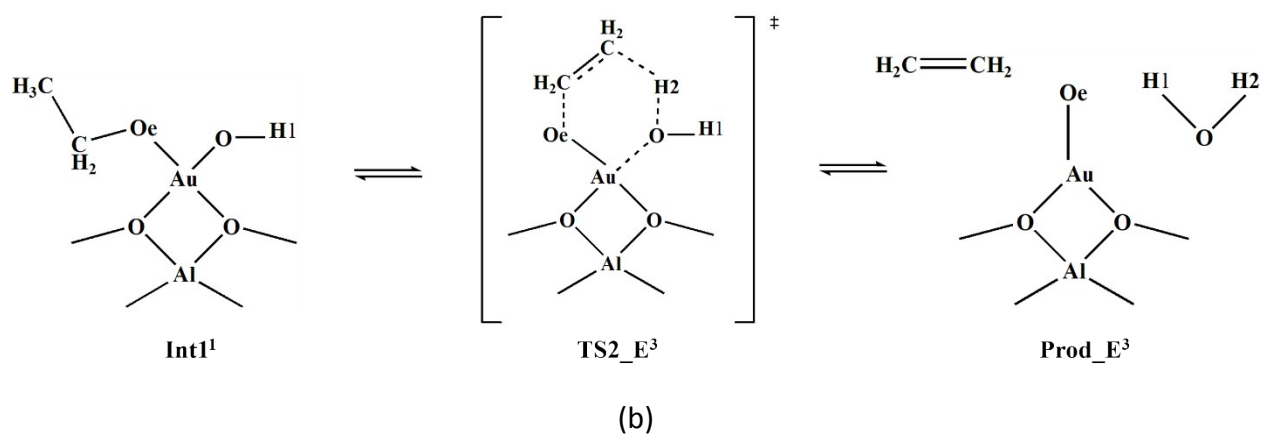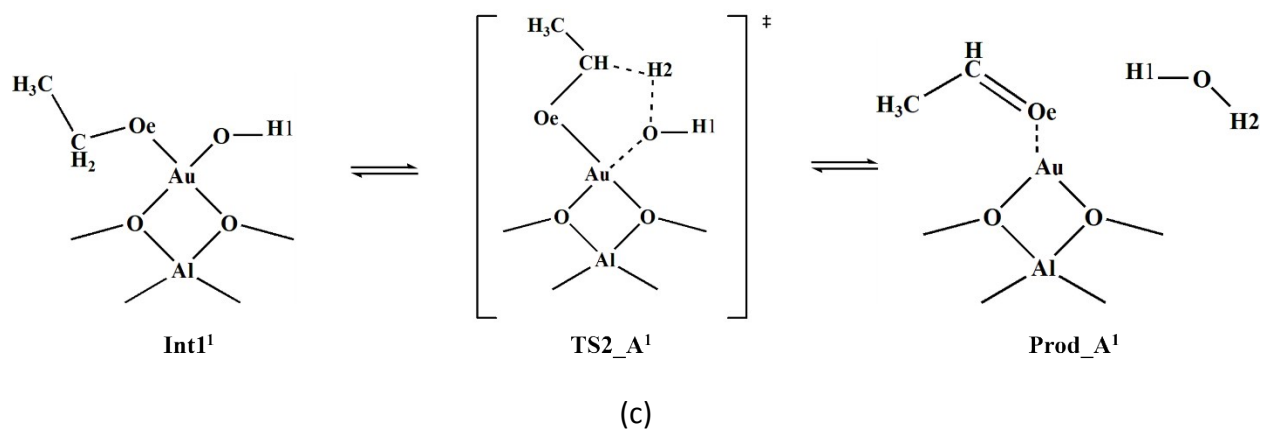

**Fig. S5** The reaction mechanisms with two-dimensional chemical structure of the ethoxide-hydroxide intermediate formation (a) and the conversion of the ethoxide-hydroxide to ethene (b) and acetaldehyde (c).

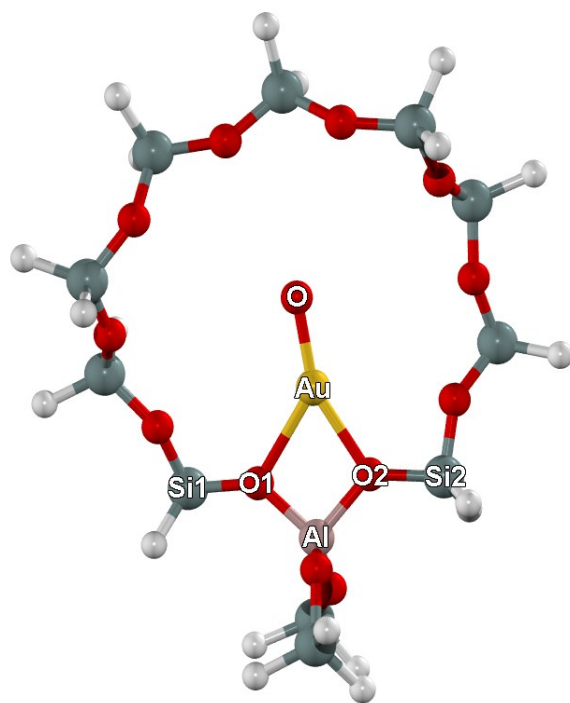

**Fig. S5** The 12T cluster model of AuO/ZSM-5 zeolite.
